# Supplementary material
Source: MDPI journal article supplement (https://www.mdpi.com/2311-7524/9/5/556)
Supplement: s1 [file s1]

**Table S1.** Summarized results from PCA method.

| PC | Eigenvalue | %<br>variance | Total variance<br>% |
|----|------------|---------------|---------------------|
| 1  | 9.8172     | 61.36         | 61.36               |
| 2  | 2.2412     | 14.01         | 75.37               |
| 3  | 1.9048     | 11.91         | 87.27               |
| 4  | 0.8760     | 5.47          | 92.75               |
| 5  | 0.6698     | 4.19          | 96.93               |
| 6  | 0.2065     | 1.29          | 98.22               |
| 7  | 0.1711     | 1.07          | 99.29               |
| 8  | 0.0472     | 0.29          | 99.59               |
| 9  | 0.0310     | 0.19          | 99.78               |
| 10 | 0.0197     | 0.12          | 99.90               |
| 11 | 0.0086     | 0.05          | 99.96               |
| 12 | 0.0039     | 0.024         | 99.98               |
| 13 | 0.0014     | 0.009         | 99.99               |
| 14 | 0.0009     | 0.005         | 100.00              |
| 15 | 0.0005     | 0.003         | 100.00              |
| 16 | 0.0002     | 0.001         | 100.00              |

**Table S2.** Statistical significance values from sample profiles pairwise comparisons calculated with MANOVA method (P = 0.05).

[illegible]
